# Supplementary material for: SARS-CoV2 Induced Biochemical Mechanisms in Liver Damage and Intestinal Lesions.
Source: Research Square preprint supplement (doi:10.21203/rs.3.rs-1331115/v1), 2022-03-07
Supplement: Supplementary file 1 [file cc7fd52126608a17424bd8db.xlsx]

## Sheet: Лист1
дата рождения	возраст	поступление	выбытие	течение	течение2	ДН	ЖКТ	ЖКТ+	ГБ	СД	тяжесть	тяжесть3	признаки поражения микарда	Hb	ЦП	лейкоциты	лимфоциты	моноциты	эозинофилы	нейтрофилы палочки	нейтрофилы сегменты	тромбоциты	эритроциты	СОЭ	Hb4	ЦП5	лейкоциты6	лимфоциты7	моноциты8	эозинофилы9	нейтрофилы палочки10	нейтрофилы сегменты11	тромбоциты12	эритроциты13	СОЭ14	глюкоза	билирубин	АЛТ	АСТ	КК МБ	мочевина	креатинин	общий белок	альбуин	С реактинвный белок	глюкоза17	билирубин18	АЛТ19	АСТ20
1971-04-03	40	2020-05-08	2020-05-30	нетяжелое	1	0	0	0	1	0	средняя	2	1	111	0.77	6.6	26	4	0	0	70	230	4.7	18	110	0.78	13.5	22	0	2	0	76	273	4.5	18	11.2	4.2	15	70		6.1	99	77		3	11	37		29
1950-11-15	69	2020-04-11	2020-04-24	тяжелое	3	3	1	1	0	0	средняя	2	0	135	0.88	6.4	30	8	0	0	62	250	4.72		147	0.89	7.1	31	6	0	4	59	383	5.07	32	6.5	9.7	27	48		9	51	54			5.1		17	16
1986-04-10	34	2020-05-07	19.05.2020	нетяжелое	1	0	0	0	0	0	средняя	2	0	127	0.81	4.8	15	3	0	11	71	155	5.8	32	135	0.81	4.3	40	3	7	0	46	326	5.41	29	15.1	16.4	48	158		9.8	160	74		288	4.4		179	102
16.11.1939	80	2020-04-29	2020-05-16	нетяжелое	1	0	1	1	1	1	средняя	2	1	117	0.83	13.8	18	4	0	0	78	265	4.4		109	0.84	7.2	23	0	2	25	50	406		15	7.4	11.4	16	35		4	96				7.6		20	36
1976-04-16	44	2020-05-01	2020-05-22	нетяжелое	1	0	0	0	0	0	средняя	2	0	139	0.86	7.9	22	5	0	0	73	270	5.1		124	0.84	7.5	45	5	0	1	48	333	4.62	12	5.1	6.7	12	22		3	74	74		0			35	39
1981-03-13	39	09.04.2020	2020-04-24	нетяжелое	1	0	0	0	0	0	средняя	2	0	149	0.86	7.5	19	7	0	0	64	233	5.54	10	138	0.85	7.2	29	5	8	3	55	318	5.04	25	5.8	10.5	59	61		4.5	81						17	15
1975-03-03	45	2020-05-01	2020-05-16	нетяжелое	1	0	0	0	0	0	средняя	2	1	127	0.86	4.4	32	7	0	0	61	138	4.61		124	0.86	4.7	39	2	2	0	57	201	4.53	14	6	4.2	19	28		3.6	94				5		30	27
1980-03-27	40	2020-04-11	2020-04-24	нетяжелое	1	0	1	2	0	0	средняя	2	0												141	0.87	8.3	26	3	0			402	5.08	15			49	32									33	18
1959-11-09	60	2020-04-24	2020-05-13	нетяжелое	1	0	1	1	1	0	средняя	2	1	153	0.91	5.3	17	6	0	0	77	113	5.25		136	0.91	10.2	32	14	0	8	46	195	4.6	3	6.2	9.5	15	29		5.4	111	67					53	59
1940-08-19	79	2020-05-03	2020-05-18	средняя	2	2	0	0	1	0	легкая	1	0	105	0.83	3.9	43	6	0	0	51	219	4.03		110	0.82	5.4	38	8	0	4	50	259	4.3	7	6	4.9	36	56		4.7	94			2	3.7	29	23	40
05.02.1949	71	2020-04-20		тяжелое	3	3	1	1	1	1	тяжелая	3	0
1966-05-12	54	29.04.2020	2020-05-15	нетяжелое	1	0	1	1	0	0	средняя	2	0	123	0.71	5.2	11	3	0	0	86	180	5.54		144	0.73	11.2	28	3	2	8	59	534	6.3	34		5.2	18	31		5.3	92			61.2			80	125
1958-12-30	61	2020-04-11	2020-04-23	нетяжелое	1	0	0	0	1	0	средняя	2	1	160	0.85	4.4	33	2	0	16	49	156	5.75	12	149	0.85	8.2	17	4	0	8	71	318	5.28	52	5.2	28.4	19	30		36.5	66	67		50			23	17
1958-04-02	62	2020-04-11	2020-04-24	средне-тяжелое	2	2	0	0	1	1	средняя	2	1	138	0.84	4.7	24	5	1	6	64	177	5.08	5	151	0.83	12	23	5	0	3	69	335	5.53	12	8.2	8.8	17	23		6.7	63			3.6	6.8		21	18
1952-04-24	68	2020-04-23	2020-05-16	нетяжелое	1	0	0	0	1	0	средняя	2	0	118	0.89	5.8	36	5	5	12	42	214	4.09	33	111	0.89	6.5	52	8	0	6	40	189	3.87	10		6	14	37		4.1	95	62		5	4.9		27	29
1982-11-14	31	2020-04-20	2020-04-29	нетяжелое	1	0	0	0	0	0	средняя	2	0	123	0.93	7.6	58	6	2	2	32	267	4.18	12	133	0.94	5.7	42	1	0	5	52	310	4.43	6	4.8	11.1	14	15		3.9	107	56		0			13	16
		2020-05-02	05.06.2020		3	3	0	0	0	0	легкая	1	1												108	0.87	6.5	30	7	0	5	58	259	3.81	52											4.3	7.7	10	20
04.11.1960	59	2020-04-13	2020-05-26	тяжелое	3	1	1	1	1	0	средне-тяжелое	2	0												97	0.94	5.3	30	30	0	4	57	238	3.28	12											5.2	6.1	21	25
1949-11-11	70	2020-04-22	2020-05-16	нетяжелое	1	0	0	0	1	0	средняя	2	0	124	0.88	8.6	65	6	1	4	24	268	4.43	10	125	0.87	6.3	37	6	0	5	52	339	4.54	36	5.6	8	30	34		2.5	87			6			16	32
08.04.1965	55	2020-05-08	2020-05-21	нетяжелое	1	0	1	1	0	0	средняя	2	1	141	0.88	8.3	33	7	1	2	57	309	4.88	22	129	0.89	7.3	58	8	4	1	29	365	4.5	3	5.1	8	37	37		4.5	63			192	5.3		164	129
1948-01-21	72					3	1	1	1	1	средняя	2	0
1949-04-22	71	2020-05-12	2020-05-16	нетяжелое	1	0	0	0	1	0	средняя	2	1	111	0.81	7.5	28	12	0	10	50	451	4.5	25	106	0.82	5.8	21	7	0	4	62	381	4.26	35	4.9	4.7	24	28		6.1	104	71		45	5		19	21
1978-05-19	42	2020-04-09	2020-06-16	тяжелое	3	3	1	1	0	0	тяжелая	3	0	123	0.81	6.6	6	4	0	8	78	291	4.7	52	107	0.84	10.4	62	4	4	4	26	277	9.8	64	4.5	7.9	33	82		7.5	62				6.6	3.6	17	24
1966-10-10	53	2020-05-03	2020-05-16	нетяжелое	1	0	0	0	0	0	средняя	2	0	141	0.9	7.5	22	4	0	0	74	151	4.91		142	0.9	4.1	42	8	1	1	48	161	4.9	5	4.3	8.3	26	26		5.6	90	70		1			18	28
1982-08-12	37	2020-04-11	2020-04-24	нетяжелое	1	0	0	0	0	0	средняя	2	1	146	0.87	5.9	24	4	0	6	67	176	5.04	4	147	0.87	5.7	35	4	0	5	56	280	5.15	7	7.2	9.9	37	32		4	58	58					21	13
1974-07-15	45	02.05.2020	2020-05-15	нетяжелое	1	0	0	0	0	0	средняя	2	0												134	0	9.5	42	12	0	2	44	250	5.2	7											5.2	13.9	20	25
27.02.1942	78	2020-04-28	2020-05-16	нетяжелое	1	0	0	0	1	0	средняя	2	1	126	0.92	9	23	5	2	2	68	272	4.39	24	123	0.75	5	44	12	0	2	42	221	5.4	3	5.4	5.9	13	16		5.3	123	67		34.5			17	26
1961-06-12	59	20.10.2020	21.10.2020	нетяжелое	1	0	1	1	0	0	средне-тяжелое	2	0
1905-05-13	60	22.10.2020				3	1	2	1	0	тяжелая	3	0
1968-12-05	52	2020-11-28	2020-12-09	нетяжелое	1	1	1	3	0	0	средняя	2	0	158	0.8	4.8	27	16			57	232	5.12		140	0.87	11.5	12	5		12	70	394	4.63	7	7.1	15.2	55	84			120			0	3.1	4.3	42	51
1945-11-17	75	2020-11-23	2020-12-06	нетяжелое	1	1	0	0	1	1	средне-тяжелое	2	0	135	0.89	7.2	18	8			74	226	4.86		123	0.9	7.2	17	6			70	304	4.27	24	9.1	18.7	16	28		5	81			67	6.7	16.8	54	39
1945-05-28	75	14.11.2020	2020-12-14	тяжелое	3	2	0	0	1	1	средне-тяжелое	2	0	145	0.81	5.5	24	6			70	204	5.8		138	0.83	6.4	35	5			60	17	5.24	2	5.7	15.2	42	104		7.5	104		72		3.4	16.4
1963-09-01	57	25.11.2020	2020-12-05	нетяжелое	1	1	1	2	0	0	средне-тяжелое	2	0	156	0.78	9.7	27	3			70	200	5.35		164	0.88	24	13	4		5	75	365	5.53	5	5.2	12.2	63	93			101	73	33	72	5.9	2.5	97	40
1941-03-01	79	2020-11-17	2020-11-25	тяжелое	3	3	0	0	1	1	крайне тяжелое	4	0			9.8	14			15							19.2	10			19	87					29.8		122			146			82				64
05.06.1954	66	21.10.2020	2020-11-08	тяжелое	3	3	1	1	1	0	тяжелое	3	0				16				79						20.8	1			12	79										140			27			137	130
1958-06-11	62	2020-11-17	2020-12-03	тяжелое	3	3	1	1	1	0	тяжелое	3	0				9				86						29.2	2										81	235						175	10.4
1956-05-12	64	13.10.2020	2020-11-08	тяжелое	3	3	0	0	1	0	тяжелое	3	1	143	0.86	5.7	25	5	0	6	143	205	5.1	25	120	0.86	12.7	15	9	3	3	70	160	4.02	15	6.1	7.1	43	75		4.7	104	72		88	5	15.4	97	66
19.09.1971	49	2020-09-22	2020-10-02	нетяжелое	1	0	0	0	0	0	средне-тяжелое	2	0	141	0.78	5.5	20	15			65	502	5.3		136	0.77	13.4	20	12			68	318	5.1	7	6.3	15.8	26	24		6.3	125	72		142.6	5.2	16.1	51	27
1960-06-21	60	20.10.2020	2020-10-29	нетяжелое	1	0	1	1	0	0	средне-тяжелое	2	0	152	0.83	7.9	27	6			67	202	5.31	30	147	0.91	9.9	21	5	0	7	67	340	5.51	28	5.3	7.2	22	62		6.3	148	78	46	58	5.6		110	32
1954-11-20	66	2020-11-26	07.12.2020	тяжелое	3	2	0	0	1	1	средняя	2	0	120	0.88	9.3	10	6			84	234	4.02		127	0.84	24	15	5			71	215	4.37	13	21.4	12.9	54	52			56	60	27	56	10.4	8.9	27	18
1941-11-02	59	2020-11-04	2020-11-11	тяжелое	3	2	1	3	1	0	тяжелое	3	0			19.4	10				81						20.2	6				88				9			88								22.7		74
1953-06-20	67	2020-10-20	28.10.2020	нетяжелое	1	0	0	0	1	0	средне-тяжелое	2	1	150	0.82	7.6	38	6			56	257	5.24	45	137		4.1	29	5	0	3	63	286	4.78	37	8.8		31	41		6	0.095	62	34	55
1930-01-05	90		14.12.2020				0	0	1	0	тяжелое	3				11.3	6				90		5.64				10.3	9			9	80										148				3
1947-05-25	73	2021-02-14	2021-03-01	тяжелое	3	2 ст	0	0	1	0		3	1	138	0.8	6.7	17	3			80	247	5		130	0.79	8.3	17	1		80		220	4.9	5	10	21.8	37	35		4.9	109			49	6.9		42	46
1950-04-13	70	2021-01-22	2021-02-24	тяжелое	3	2 ст	0	0	1	0		3	0	103	0.84	8.8	9	6			85	325	3.98		134	0.83	14.8	13	7		80		214	7	40	7.5	11.5	45	84		8	146	62		138	5.8	21.2	35	27
1951-01-08	70	2021-02-11	2021-02-26	тяжелое	3	1 ст	0	0	0	0		3	0	137	0.78	5.3	24	6			70	134	5.06		132	0.81	8.1	10	9		81		293	4.88	5	6.3	20.2	12	21		6.4	61	67		18	8		101	36
1956-06-17	64	2021-02-10	2021-02-26	нетяжелое	1	0-1 ст	0	0	1	0		2	0	138	0.87	5.8	21	6			73	239	4.7		144	0.94	8.2	30	6		64		328		33	7.3	6.6	15	34		7.5	88	74			4.5	8.2	51	31
1957-06-28	63	2021-02-04	2021-02-20	тяжелое	1	1 ст	0	0	1	0		3	0	82	0.87	3.7	11	6			83	150	2.9		91	0.89	6.8	11	2	7	80		192	3.27	27	7.7	76.8	12	32		5.4	77	63		157	10.3		16	21
1963-11-08	57	2021-02-04	2021-02-20	нетяжелое	1	0 ст	0	0	0	0		2	0	127	0.98	4.6	20	9			71	32	3.99		150	0.98	4	35	11		54		20	4.6	8	4.5	44.1	64	170		2.6	51	72			4.6			154
1936-01-01	85	2021-02-15	2021-03-02	нетяжелое	1	0 ст	0	0	1	1		2	1	121	1.2	1.6	50	6			44	101	2.98		103	1.2	4.8	23	7		70		126	2.54	47	6.2	19	46	69		4	79	67		11	8.7	25.3	40	30
1959-12-13	61	2021-02-12	2021-02-26	нетяжелое	1	0 ст	0	0	1	0		2	1	167	0.83	4	27	4			69	118	5.85		163	0.91	10.6	30	3		61		321	5.6	11	6.1	12.6	22	28		6.5	95	62		24	4.6		83	36
1956-12-21	64	2021-02-17	2021-03-09	нетяжелое	1	0 ст	0	0	1	0		2	1	147	0.91	6	20	5			75	199	4.86		141	0.91	9.1	29	6		65		219	4.65	11	9.4	6.4	52	43		5.6	103	73		12.9	5.4		6	29
1944-01-10	77	2021-02-04	2021-03-19	нетяжелое	1	1 ст	0	0	0	1		2	0	154	0.97	10	10	1			89	379	4.7		104	0.95	7.5	21	4		75		104	3.32	57	8.5	12.5	19	26		3.7	98	72			5		29	19
1953-03-04	68	2021-02-11	2021-02-24	нетяжелое	1	0 ст	0	0	1	0		2	0	147	0.84	4.7	26	4			70	210	4.7		143	0.84	5.9	25	10		65		307	5.14	15	7.4	7.4	29	37		5.2	57			20	5.2	8.9	26	19
1961-06-06	59	2021-02-11	2021-03-02	тяжелое	1	1 ст	0	0	1	0		3	0	124	0.86	3	51	9			40	173	4.3		134	0.92	18.2	14	6		80		221	3.23	9	7.1	14.7	65	59		6.3	69			33	4		54	16
1963-03-20	58	2021-02-18	2021-03-01	нетяжелое	1	0 ст	0	0	0	0		2	0	111	0.86	3.1	41	10			49	155	3.92		103	0.85	3.7	45	5		50		152	3.57	54	5.4	10.7	24	33		16.4	260	89			5		45	54
1986-12-09	34	2021-02-16	2021-03-01	тяжелое	1	0 ст	0	0	0	0		3	0	116	0.86	6.5	8	3			89	290	4		113	0.97	13.6	10	4		65		354	3.69	8	7.1	9.7	24	26		6.8	91	64			21.6		88	35
1947-01-01	74	2021-01-22	2021-02-26	тяжелое	3	1 ст	0	0	0	0		3	0	133	0.91	5.9	27	12			61	239	4.61		153	0.97	13.5	11	9		80		279	5.16		7.4	11.1	13	19		8.4	104	64			7		52	37
1963-04-06	57	2021-02-18	2021-03-05	нетяжелое	1	1 ст	0	0	0	0		2	0	149	0.89	5.6	35	5			60	191	4.97		164	0.97	18.2	15	4		77		221	5.27	9	8.6	12.6	10	22		4.4	93	77			3.9
1955-08-28	65	2021-02-21	2021-03-04	нетяжелое	1	0 ст	0	0	1	1		2	0	171	0.87	6.7	25	7			68	197	5.62		152	0.86	9.6	25	4		71		256	5.1	17	6.7	19.7	17	22		4.9	72	74			5.2		63	61
1963-08-14	57	2021-02-18	2021-03-03	нетяжелое	1	0 ст	0	0	1	0		2	1	165	0.87	8.3	19	7			74	195	5.64		149	0.86	12.8	15	5		80		236	5.23	12	6.8	10.9	65	84		8.2	72	75			4.9		80	27
1951-10-27	69	2021-02-09	2021-02-25	нетяжелое	1	0 ст	0	0	0	0		2	0	143	0.91	6.4	32	6			62	158	4.64		138	0.92	15.4	22	6	0	68		332	4.4	12	5.3	5.4	20	43		3.6	89	63			4.7		41	29
1940-12-30	80	2021-02-16	2021-03-11	тяжелое	3	2 ст	0	0	1	0		3	0	124	0.86	5.5	21	3			76	180	4.3		134	0.96	11.8	16	9		75		277	4.6		5.9		26	40		15.6	157	72		82.2	8		7	17
1949-01-01	72	2021-02-27	2021-03-10	нетяжелое	1	0 ст	0	0	1	0		2	0	149	0.92	5.7	34	6			60	227	5.02		129	0.85	7.5	35	5		60		219	4.51	17	6.1	22.6	15	22		5.6	88	78			6.3		98	89
1986-06-14	34	2021-03-01	2021-03-12	нетяжелое	1	0 ст	0	0	0	0		2	0	138	0.81	6.4	16	4			80	161	4.92		136	0.8	12.7	30	4		66		386	4.94		6.4	8.8	18	19		4.1	95				6.5		27	26
1954-11-24	66	2021-03-02	2021-03-12	тяжелое	3	1 ст	0	0	1	0		3	0	163	0.97	7.3	11	4			85	251	5.25		163	0.98	14.8	9	11		80		429	5.27		7.9	11.2	17	34		2.9	74	69			7.3		11	28
1936-11-29	84	2021-03-07	2021-03-22	нетяжелое	1	0 ст	0	0	1	0		2	1	127	0.91	8.1	16	4			80	232	4.22		136	0.88	7	23	5		72		218	4.66		9.5	12.5	22	29		4.8	50	68			6.5		17	17
1972-12-26	48	2021-03-09	2021-03-22	нетяжелое	1	0 ст	0	0	1	0		2	1	147	0.89	5	30	4			66	160	4.9		155	0.87	13.4	34	5		60		308	5.35	7	5.6	5.5	50	25		2.9	54	73			5.5		229	80
1950-01-22	71	2021-03-08	2021-03-22	тяжелое	3	1 ст	0	0	1	1		3	1	117	0.84	5.8	42	8			50	350	4.06		130	0.92	10.1	36	11		50		207	4.27	13	4.8	16.7	12	34		5.7	55	67			19.6	0
1957-11-07	63	2021-03-10	2021-03-26	тяжелое	3	1 ст	0	0	1	0		3	0	156	0.85	6.4	20	6			74	195	5.11		161	0.94	7.5	43	10		40		233	5.1	22	7.9	29.5	24	22		5.1	88	6.9			4.5		73	25
1936-03-01	85	2021-03-15	2021-03-26	нетяжелое	1	0 ст	0	0	1	0		2		126	0.9	6.6	26	4			70	249	4.46		128	0.88	7.3	16	4		80		247	4.31	12	6.6	9.1				6.7	122	65			6.4	11.2	16	14
1936-02-07	85	2021-03-14	2021-04-06	средне-тяжелое	2	0 ст	1	3	1	0		2		101	0.7	10.7	32	6			60	230	5.15	3	88	0.69	11.5	15	5		80		273	4.39	11.5											11.5	4.4	15	26
1955-06-17	66	2021-03-15	2021-03-29	тяжелое	1	1 ст	1	3	1	0		3		98	0.9	5.8	18	4			78	213	3.28		158	0.98	7.3	18	7		5	70	405	5.08	10	6.9	16.1	43	56		4.9	110	72			10	5.6	33	29
1960-07-02	61	2021-03-13	2021-03-24	нетяжелое	1	0 ст	1	2	1	0		3		115	0.92	7.8	21	4			75	313	4.19		121	0.9	11	24				70	306	4.24		5.9	10.2	39	39		7	96	56	30.7	28	5.2
1949-06-03	72	2021-03-14	2021-03-29	нетяжелое	1	0 ст	0	0	1	1		2		139	0.94	7.1	6	4			90	184	62		132	0.9	8.9	28	9			66	269	4.71	17	7.8	12	29	30		7.6	91	64			6.5	7
1948-10-07	72	2021-03-25	2021-04-13	нетяжелое	1	1 ст	0	0	1	0		2		145	0.92	15.8	15	5			80	179	4.83		136	0.89	13.2	20	4			70	159	4.52	12	5.3	5.5	45	33		13.1	115	76		5.7	6		67	26
1951-11-27	69	2021-03-16	2021-04-05	тяжелое	3	1 ст	1	3	1	0		2		112	0.72	2.3	35	10			55	22	4.65		105	0.87	7.7	48	3	3	3	43	90	4.22	24	8.6		28	50		18.2	84				4.4	7.7	43	47
1978-07-22	42	2021-06-02	14.06.2021 г.	нетяжелое	1	0 ст	0	0	0	0		3	0	141		4.2	30					128	4.7		142		6.6	40	10	0	0	50	300	4.9	8	6.4	22.1	22	25		3.1	89	71			5.1	15.5	248	91
03.12.1939	82	28.05.2021	2021-06-06	нетяжелое	1	0 ст	0	0	1	0		2	0	127		4.3	21.9					199	3.98		115		6.8	31.7					207	3.52		5.6	18.5									5		36	36
1976-08-27	44	2021-05-26	2021-06-09	нетяжелое	1	0 ст	1	1	0	0		2	1	129		9.4	30					433	4.37	20	122		223.5	15.8					446	4.15				66				78	61			3.9		130	59
2002-11-25	18	2021-06-04	2021-06-10	нетяжелое	1	0 ст	0	0	0	0		2	0	134		5.6	39.1					175	4.49	10	137		5.1	59.9					177	4.6	31	4.4	5.4	9	26		3.2	83	70
1965-05-28	56	2021-05-28	2021-06-14	нетяжелое	1	0 ст	1	3	0	0		2	0	149		5.6	18.4					211	5.56		125		5.3	20.4					419	4.79		6.3	12.7	22	14			110	75	50		6.9	1	40	39
2001-04-18	20	2021-05-26	08.06.2021	нетяжелое	1	0 ст	1	3	0	0		2	0	150		6.9	2.7					203	5.17		131		23.3	9	5		5	81	516	4.3		5.3		55	85		3.6	98	80			4		47	38
1958-12-17	62	2021-05-26	08.06.2021	нетяжелое	1	1 ст	0	0	0	1		2	0				16	2		8	74			2	164		9.1	1.8					391	9.1	2	6	30.4		27			72
1969-02-04	52	2021-05-30	2021-06-13	нетяжелое	1	0 ст	0	0	1	0		2	0	151		7.9	2.5					213	5.14		144		10.9	3.2					188	4.77			20.5	62	50		4	102	76			7	6.4	64	17
18,04,1970	50	20210313_074547 20210313_075400 20210313_080147	2021-06-08		1	0	0	0	1	0		2	1	144	0.94	8.4	10	5			85		4.57	51	129	0.93	7.2	11	7			82		4.47	31	7.4	12.5	22	36		3	86			115	6.7	6.8	70	39
1971-03-24	49	2021-05-26	2021-06-09		2	0	1	1	0	0		2	0	115		3.2	35.1					125	4.09	26	106		7.7	28.5					352	3.68		5.9	4.7	18			3.7		58			4	8.8	7	10
09.04.1956	65	2021-05-27	2021-06-10				0	0	1	1		1	0	142		4	35.2					200	5.2		135		6.9	21	10		5	64	281	4.93	20	6	2.7	75	108		5.3	90	80			4.4		21	21
1954-12-17	67	2021-05-28	2021-06-11			2	0	0	1	0		2	0												126		6.1	43.7					293	4.39			7.8		26		5.3	86	70
1956-04-20	65	2021-05-29	2021-06-12		1	0	1	3	1	0	0		0	160		12.3	6.6					223	5.92		159		11.1	28.8					286	5.96			14.7									6.7	8.5	27	24
1971-12-16	50	2021-05-30	2021-06-13	2	1	0	1	1	0	0		2	0	151		2.7	23.9					47	5.15		158		7.5	30	5		5	60	228	5.43	22	6.1	18.1	36	50		1.7	76	74	42.3				103	28
1981-01-05	40	2021-05-31	2021-06-14			0	0	0				2	0	115		3.2	30					170	4.3		105		5.7	36.3					282	3.99	25	5.2		15	27		4.1	44	62			4.4
29.12.1962	59	2021-05-26	2021-06-08	2	2	0	0	0	1	0	2	2	0	145		5.5	25.8	30				200	4.83	22	155			7	5		7	81	502	5.15	6	7.6	29.3	17	38	9	3.7	107	65			6.5	11.2	12	41
[truncated: 30 more columns]
